# Supplementary material for: Suppression of NK Cell Activation by JAK3 Inhibition: Implication in the Treatment of Autoimmune Diseases
Source: Hindawi journal article supplement (doi:10.1155/2023/8924603), 2023-12-08

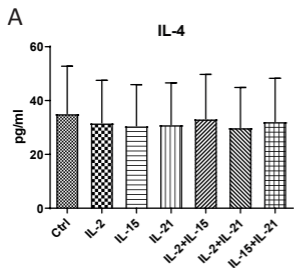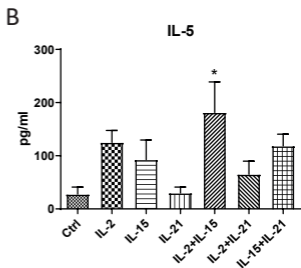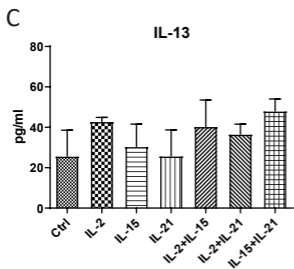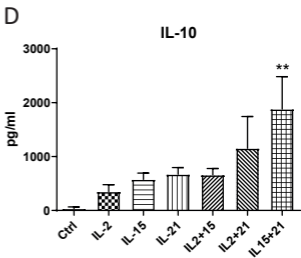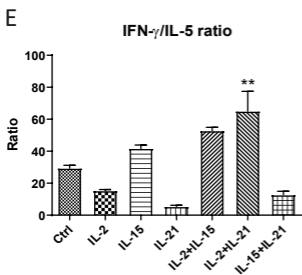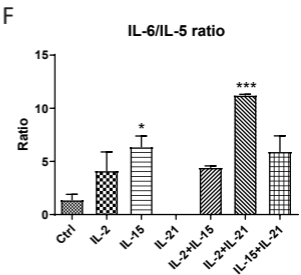

Supplement: f1 [file 8924603.f1.pdf]
