# Supplementary material for: Suppression of NK Cell Activation by JAK3 Inhibition: Implication in the Treatment of Autoimmune Diseases
Source: Hindawi journal article supplement (doi:10.1155/2023/8924603), 2023-12-08

A

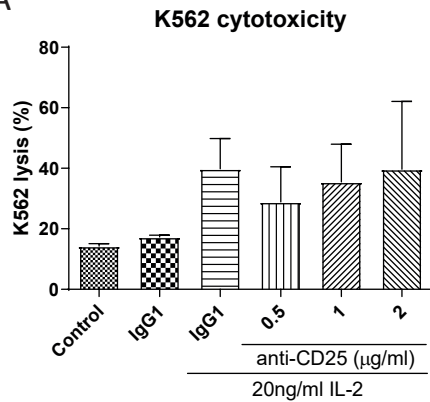

B

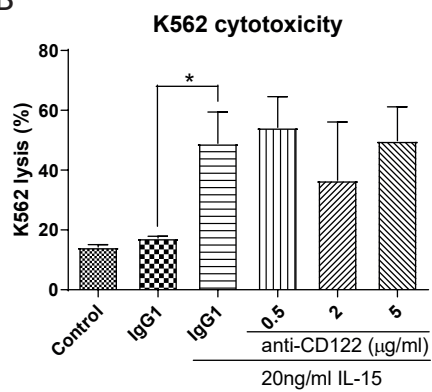

C

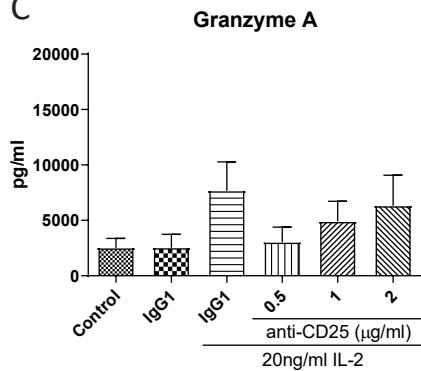

D

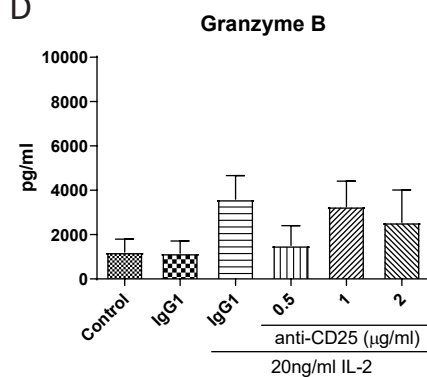

E

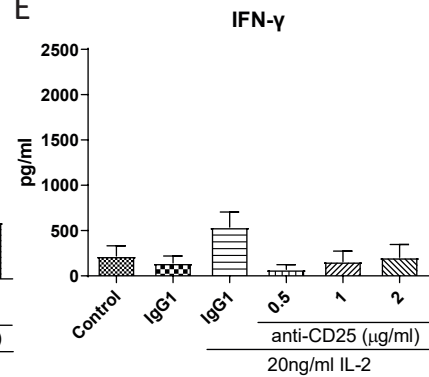

F

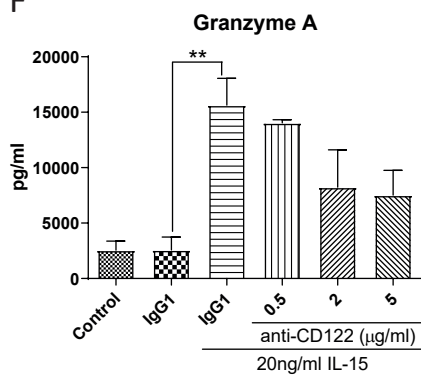

G

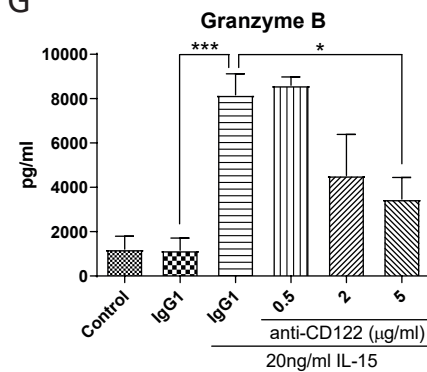

H

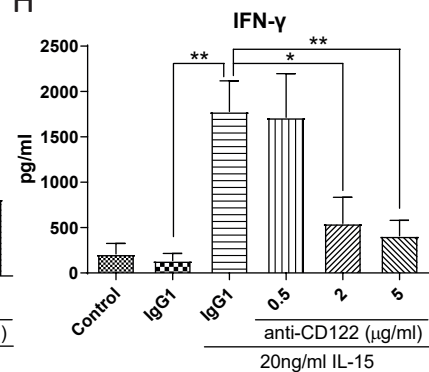

Supplement: f3 [file 8924603.f3.pdf]
